# Supplementary material for: Development of a food-based diet quality score for Japanese: associations of the score with nutrient intakes in young, middle-aged and older Japanese women
Source: PubMed Central journal article supplement (PMC5465807; doi:10.1017/jns.2016.36), 2016-10-28
Supplement: S2048679016000367sup001.pdf [file S2048679016000367sup001.pdf]

**Supplemental Table 1.** Scoring system of the Japanese diet score used in the present study

| Category*            | Food groups                                                                                                                                                                                                                                                                                                                                                                                                    | Food item                                                                                                                                                                                                                                                                                                                                                                                                                                                                                     |                                                                                                                              | Original score    |                                      | Modified score    |                           |
|----------------------|----------------------------------------------------------------------------------------------------------------------------------------------------------------------------------------------------------------------------------------------------------------------------------------------------------------------------------------------------------------------------------------------------------------|-----------------------------------------------------------------------------------------------------------------------------------------------------------------------------------------------------------------------------------------------------------------------------------------------------------------------------------------------------------------------------------------------------------------------------------------------------------------------------------------------|------------------------------------------------------------------------------------------------------------------------------|-------------------|--------------------------------------|-------------------|---------------------------|
|                      |                                                                                                                                                                                                                                                                                                                                                                                                                | DHQ†                                                                                                                                                                                                                                                                                                                                                                                                                                                                                          | BDHQ‡                                                                                                                        | Serving consumed§ | Score given                          | Serving consumed§ | Score given               |
| Grain dishes         | White rice                                                                                                                                                                                                                                                                                                                                                                                                     | White rice (1 item)                                                                                                                                                                                                                                                                                                                                                                                                                                                                           | White rice (1 item)                                                                                                          | < 4               | 10 × (serving consumed)/4            | < 4               | 10 × (serving consumed)/4 |
|                      | Other grains                                                                                                                                                                                                                                                                                                                                                                                                   | White rice mixed with barley; white rice with germ; half-milled rice; 70 %-milled rice; brown rice (5 items)                                                                                                                                                                                                                                                                                                                                                                                  | ---                                                                                                                          | 4 to 5            | 10                                   | ≥ 4               | 10                        |
|                      |                                                                                                                                                                                                                                                                                                                                                                                                                |                                                                                                                                                                                                                                                                                                                                                                                                                                                                                               |                                                                                                                              | > 5               | 10 - 10 × [(serving consumed) - 5]/5 |                   |                           |
|                      | Noodles                                                                                                                                                                                                                                                                                                                                                                                                        | Japanese noodles (buckwheat, instant noodles and Japanese wheat noodles); instant noodles; Chinese noodles; spaghetti and macaroni (4 items)                                                                                                                                                                                                                                                                                                                                                  | Buckwheat and instant noodles; Japanese wheat noodles; instant noodles and Chinese noodles; spaghetti and macaroni (4 items) |                   |                                      |                   |                           |
|                      | Bread                                                                                                                                                                                                                                                                                                                                                                                                          | White bread; butter roll; croissant (3 items)                                                                                                                                                                                                                                                                                                                                                                                                                                                 | Breads (including white bread and Japanese bread with a sweet filling) (1 item)                                              |                   |                                      |                   |                           |
| Other grain products | Pizza; Japanese-style pancakes; cornflakes (3 items)                                                                                                                                                                                                                                                                                                                                                           | ---                                                                                                                                                                                                                                                                                                                                                                                                                                                                                           |                                                                                                                              |                   |                                      |                   |                           |
| Vegetable dishes     | Potatoes                                                                                                                                                                                                                                                                                                                                                                                                       | French fries; potatoes; sweet potatoes, yams, and taro; konnyaku (i.e., devil's tongue jelly) (4 items)                                                                                                                                                                                                                                                                                                                                                                                       | Potatoes (all varieties) (1 item)                                                                                            | < 5               | 10 × (serving consumed)/5            | < 5               | 10 × (serving consumed)/5 |
|                      | Nuts                                                                                                                                                                                                                                                                                                                                                                                                           | Peanuts; other nuts (2 items)                                                                                                                                                                                                                                                                                                                                                                                                                                                                 | ---                                                                                                                          | 5 to 6            | 10                                   | ≥ 5               | 10                        |
|                      |                                                                                                                                                                                                                                                                                                                                                                                                                |                                                                                                                                                                                                                                                                                                                                                                                                                                                                                               |                                                                                                                              | > 6               | 10 - 10 × [(serving consumed) - 6]/6 |                   |                           |
| Total vegetable      | Carrots; pumpkins; tomatoes; green peppers; broccoli; green leafy vegetables; salted pickled plums; cabbage; cucumbers; lettuce; Chinese cabbage; bean sprouts; radishes; onions; cauliflower; eggplants; burdock; lotus root; salted pickles (leafy vegetables); salted pickles (others); mushrooms; wakame and hijiki seaweed; laver (i.e., dried, edible seaweed); vegetable juice; tomato juice (25 items) | Salted green and yellow vegetable pickles; other salted vegetables (excluding salted pickled plums); raw vegetables used in salad (e.g., cabbage and lettuce); green leafy vegetables including broccoli; cabbage and Chinese cabbage; carrots and pumpkins; radishes and turnips; other root vegetables (e.g., onions, burdock, and lotus root); tomatoes, tomato ketchup, boiled tomato, and stewed tomato; mushrooms (all varieties); seaweeds (all varieties); vegetable juice (12 items) |                                                                                                                              |                   |                                      |                   |                           |

Supplemental Table 1. Continued

| Category*                      | Food groups         | Food item                                                                                                                                                                                                                                                                     |                                                                                                                                                                                                                                                                                                                                                             | Original score    |                                               | Modified score    |                                               |
|--------------------------------|---------------------|-------------------------------------------------------------------------------------------------------------------------------------------------------------------------------------------------------------------------------------------------------------------------------|-------------------------------------------------------------------------------------------------------------------------------------------------------------------------------------------------------------------------------------------------------------------------------------------------------------------------------------------------------------|-------------------|-----------------------------------------------|-------------------|-----------------------------------------------|
|                                |                     | DHQ†                                                                                                                                                                                                                                                                          | BDHQ‡                                                                                                                                                                                                                                                                                                                                                       | Serving consumed§ | Score given                                   | Serving consumed§ | Score given                                   |
| Fish and meat dishes           | Meat                | Ground beef and pork; chicken; pork; beef; liver; ham and sausages; bacon (7 items)                                                                                                                                                                                           | Chicken (including ground chicken); pork and beef (including ground and beef); ham, sausages, and bacon; liver (4 items)                                                                                                                                                                                                                                    | < 3               | 10 × (serving consumed)/3                     | < 3               | 10 × (serving consumed)/3                     |
|                                |                     |                                                                                                                                                                                                                                                                               |                                                                                                                                                                                                                                                                                                                                                             | 3 to 4            | 10                                            | ≥ 3               | 10                                            |
|                                |                     |                                                                                                                                                                                                                                                                               |                                                                                                                                                                                                                                                                                                                                                             | > 4               | 10 - 10 × [(serving consumed) - 4]/4          |                   |                                               |
|                                | Egg                 | Eggs (1 item)                                                                                                                                                                                                                                                                 | Eggs (1 item)                                                                                                                                                                                                                                                                                                                                               |                   |                                               |                   |                                               |
|                                | Pulses              | Tofu (i.e., soybean curd); tofu products; natto (i.e., fermented soybeans); boiled beans; soy milk (5 items)                                                                                                                                                                  | Tofu (i.e., soybean curd) and tofu products; natto (i.e., fermented soybeans) (2 item)                                                                                                                                                                                                                                                                      |                   |                                               |                   |                                               |
|                                | Fish and selffish   | Dried fish; small fish with bones; canned tuna; eel; white meat fish; red meat fish; oily fish; ground fish meat products; shrimp and crab; squid and octopus; oysters; other shellfish; fish eggs; boiled fish and shellfish in soy sauce; salted fish intestines (15 items) | Squid, octopus, shrimp, and clam; small with bones; canned tuna; dried fish and salted fish (including salted mackerel, salted salmon, and dried horse mackerel); oily fish (including sardines, mackerel, saury, amberjack, herring, eel, and fatty tuna); non-oily fish (including salmon, trout, white meat fish, freshwater fish, and bonito) (6 items) |                   |                                               |                   |                                               |
| Milk                           | Dairy products      | Sweetened yogurt; non-sweetened yogurt; moderately sweetened yogurt; cheese; cottage cheese; low-fat milk; full-fat milk; cream or creamer added to coffee (8 items)                                                                                                          | Low-fat milk and yogurt; full-fat milk and yogurt (2 items)                                                                                                                                                                                                                                                                                                 | < 2               | 10 × (serving consumed)/2                     | < 2               | 10 × (serving consumed)/2                     |
|                                |                     |                                                                                                                                                                                                                                                                               |                                                                                                                                                                                                                                                                                                                                                             | 2                 | 10                                            | ≥ 2               | 10                                            |
|                                |                     |                                                                                                                                                                                                                                                                               |                                                                                                                                                                                                                                                                                                                                                             | > 2               | 10 - 10 × [(serving consumed) - 2]/2          |                   |                                               |
| Fruits                         | Fruit               | Raisins; canned fruits; oranges; bananas; apples; strawberries; grapes; peaches; pears; persimmons; kiwi fruits; melons; watermelons; fruit juice (14 items)                                                                                                                  | Citrus fruit; strawberries, persimmons, and kiwi fruits; other fruit (3 items)                                                                                                                                                                                                                                                                              | < 2               | 10 × (serving consumed)/2                     | < 2               | 10 × (serving consumed)/2                     |
|                                |                     |                                                                                                                                                                                                                                                                               |                                                                                                                                                                                                                                                                                                                                                             | 2                 | 10                                            | ≥ 2               | 10                                            |
|                                |                     |                                                                                                                                                                                                                                                                               |                                                                                                                                                                                                                                                                                                                                                             | > 2               | 10 - 10 × [(serving consumed) - 2]/2          |                   |                                               |
| Snacks and alcoholic beverages | Alcoholic beverages | Beer; Sake; Shochu; Shochu mixed with water or a carbonated beverage; whiskey; wine; (6 items)                                                                                                                                                                                | Beer; Sake; Shochu; whiskey; wine; (5 items)                                                                                                                                                                                                                                                                                                                | ≤ 837 kJ          | 10                                            | ≤ 837 kJ          | 10                                            |
|                                |                     |                                                                                                                                                                                                                                                                               |                                                                                                                                                                                                                                                                                                                                                             | > 837 kJ          | 10 - 10 × [(energy consumed in kJ) - 837]/837 | > 837 kJ          | 10 - 10 × [(energy consumed in kJ) - 837]/837 |

**Supplemental Table 1.** Continued

| Category*  | Food groups               | Food item                                                                                                                                                                                                                                                                                                                                                                                                                   |                                                                                                                                                            | Original score    |             | Modified score      |                                              |
|------------|---------------------------|-----------------------------------------------------------------------------------------------------------------------------------------------------------------------------------------------------------------------------------------------------------------------------------------------------------------------------------------------------------------------------------------------------------------------------|------------------------------------------------------------------------------------------------------------------------------------------------------------|-------------------|-------------|---------------------|----------------------------------------------|
|            |                           | DHQ†                                                                                                                                                                                                                                                                                                                                                                                                                        | BDHQ‡                                                                                                                                                      | Serving consumed§ | Score given | Serving consumed§   | Score given                                  |
|            | Sugar and confectioneries | Jam and marmalade; sugar for coffee and black tea; Japanese bread with a sweet filling; pancakes; potato chips; rice crackers; snacks made from wheat flour; Japanese sweets with azuki beans; Japanese sweets without azuki beans; cakes; cookies and biscuits; chocolates; candies, caramels, and chewing gum; jellies; doughnuts; ice cream (premium); ice cream (unspecified varieties); ice cream (regular) (18 items) | Cakes, cookies, and biscuits; Japanese sweets; rice crackers, rice cakes, and Japanese-style pancakes; ice cream; sugar for coffee and black tea (5 items) |                   |             |                     |                                              |
|            | Soft drinks               | Fruit juice excluding 100 % juice; cocoa; lactic acid bacteria beverages; sugar-sweetened soft drinks; nutritional supplement drinks (5 items)                                                                                                                                                                                                                                                                              | Cola and sugar-sweetened soft drinks (1 item)                                                                                                              |                   |             |                     |                                              |
| Seasonings | Seasonings                | Ketchup; fat-free salad dressing; table salt; salt used during cooking; soy sauce; curry and roux in stew; miso as seasoning (7 items)                                                                                                                                                                                                                                                                                      | Table salt; soy sauce (2 items)                                                                                                                            | ---               | ---         | ≤1389 mg** (sodium) | 10                                           |
|            |                           |                                                                                                                                                                                                                                                                                                                                                                                                                             |                                                                                                                                                            |                   |             | >1389 mg** (sodium) | 10-10×((sodium consumed in mg)-1389**)/ 1389 |

DHQ, diet history questionnaire; BDHQ, brief diet history questionnaire.

\* By definition, one serving of grain dishes contained 40 g carbohydrate; one serving of vegetable dishes was 70 g; one serving of fish and meat dishes contained 6 g protein; one serving of milk contained 100 mg calcium; and one serving of fruits was 100 g.

† Used for young and middle-aged women. The following food groups were not categorized and thus not used in the calculation described here: tea and coffee (3 items), sugar-free soft drinks (1 item), fats and oils (5 items), sugar used during cooking (1 item), soups (5 items), nutritional supplement bars (1 item), artificial sweeteners (1 item), and drinking water (1 item).

‡ Used for older women. The following food groups were not categorized and thus not used in the calculation described here: tea and coffee (3 items), fats and oils (2 items), sugar used during cooking (1 item), and soups (2 items).

§ Per 7531 kJ of energy.

|| When the calculation produced a negative score because of excess servings, energy, or sodium the score was converted to 0.

¶ Not available in BDHQ.

\*\* This value (1389 mg of sodium) was based on the 10th percentile of energy-adjusted sodium intake from seasonings (per 7531 kJ) in older women.

**Supplemental Table 2.** The Japanese diet score according to categories of selected characteristics in young, middle-aged, and older Japanese women  
(Numbers and percentages; mean values and standard deviations)

|                                      | Young ( <i>n</i> 3963) |      |                 |     |          |                 |         |          |          | Middle-aged ( <i>n</i> 3800) |                 |         |          |                 |     | Older ( <i>n</i> 2211) |          |      |                 |         |          |                 |         |          |
|--------------------------------------|------------------------|------|-----------------|-----|----------|-----------------|---------|----------|----------|------------------------------|-----------------|---------|----------|-----------------|-----|------------------------|----------|------|-----------------|---------|----------|-----------------|---------|----------|
|                                      |                        |      | Original score* |     |          | Modified score† |         |          |          |                              | Original score* |         |          | Modified score† |     |                        |          |      | Original score* |         |          | Modified score† |         |          |
|                                      | <i>n</i>               | %    | Mean            | SD  | <i>P</i> | Mean            | SD      | <i>P</i> | <i>n</i> | %                            | Mean            | SD      | <i>P</i> | Mean            | SD  | <i>P</i>               | <i>n</i> | %    | Mean            | SD      | <i>P</i> | Mean            | SD      | <i>P</i> |
| Survey year                          |                        |      |                 |     | <0.0001  |                 | <0.0001 |          |          |                              |                 | <0.0001 |          | <0.0001         |     |                        |          |      |                 | <0.0001 |          |                 | 0.003   |          |
| 2011                                 | 2461                   | 62.1 | 33.0            | 7.3 |          | 43.0            | 7.8     |          | 2311     | 60.8                         | 35.2            | 7.4     |          | 43.6            | 8.2 |                        | 1408     | 63.7 | 34.9            | 7.4     |          | 50.9            | 8.0     |          |
| 2012                                 | 1502                   | 37.9 | 34.6            | 7.6 |          | 44.5            | 8.3     |          | 1489     | 39.2                         | 33.3            | 7.6     |          | 44.8            | 8.3 |                        | 803      | 36.3 | 33.1            | 7.6     |          | 49.8            | 8.0     |          |
| Residential block                    |                        |      |                 |     | <0.0001  |                 | <0.0001 |          |          |                              |                 | 0.0004  |          | 0.007           |     |                        |          |      |                 | <0.0001 |          |                 | 0.04    |          |
| Hokkaido and Tohoku                  | 379                    | 9.6  | 33.5            | 7.6 |          | 43.5            | 8.1     |          | 383      | 10.1                         | 34.4            | 7.4     |          | 44.7            | 8.4 |                        | 209      | 9.5  | 34.2            | 6.9     |          | 50.1            | 8.0     |          |
| Kanto                                | 1144                   | 28.9 | 34.5            | 7.5 |          | 44.3            | 8.3     |          | 1074     | 28.3                         | 34.7            | 7.3     |          | 44.7            | 8.3 |                        | 547      | 24.7 | 32.8            | 7.8     |          | 50.0            | 8.1     |          |
| Hokuriku and Tokai                   | 808                    | 20.4 | 33.6            | 7.2 |          | 43.7            | 8.0     |          | 840      | 22.1                         | 34.1            | 7.6     |          | 43.7            | 8.4 |                        | 539      | 24.4 | 34.7            | 7.7     |          | 50.0            | 8.4     |          |
| Kinki                                | 480                    | 12.1 | 31.5            | 7.1 |          | 41.7            | 7.6     |          | 494      | 13.0                         | 32.9            | 7.4     |          | 43.4            | 8.2 |                        | 273      | 12.4 | 35.5            | 7.7     |          | 51.5            | 8.0     |          |
| Chugoku and Shikoku                  | 557                    | 14.1 | 33.6            | 7.4 |          | 43.4            | 8.1     |          | 520      | 13.7                         | 33.7            | 7.6     |          | 43.6            | 7.9 |                        | 359      | 16.2 | 34.7            | 7.4     |          | 51.1            | 7.8     |          |
| Kyushu                               | 595                    | 15.0 | 33.7            | 7.6 |          | 43.6            | 7.6     |          | 489      | 12.9                         | 34.6            | 7.6     |          | 44.1            | 8.1 |                        | 284      | 12.8 | 34.6            | 6.7     |          | 50.9            | 7.4     |          |
| Size of residential area             |                        |      |                 |     | 0.89     |                 | 0.49    |          |          |                              |                 | 0.04    |          | 0.13            |     |                        |          |      |                 | 0.05    |          |                 | 0.05    |          |
| City with a population<br>≥ 1million | 739                    | 18.7 | 33.7            | 7.5 |          | 43.3            | 8.0     |          | 595      | 15.7                         | 33.5            | 7.3     |          | 43.6            | 7.9 |                        | 285      | 12.9 | 34.4            | 7.9     |          | 51.4            | 7.8     |          |
| City with a population<br>< 1million | 2914                   | 73.5 | 33.6            | 7.5 |          | 43.6            | 8.1     |          | 2821     | 74.2                         | 34.2            | 7.5     |          | 44.1            | 8.3 |                        | 1682     | 76.1 | 34.1            | 7.5     |          | 50.3            | 8.1     |          |
| Town and village                     | 310                    | 7.8  | 33.5            | 7.2 |          | 44.0            | 7.6     |          | 384      | 10.1                         | 34.6            | 7.4     |          | 44.7            | 8.0 |                        | 244      | 11.0 | 35.4            | 7.0     |          | 51.0            | 7.7     |          |
| Living status                        |                        |      |                 |     | <0.0001  |                 | <0.0001 |          |          |                              |                 | ---     |          | ---             |     |                        |          |      |                 | <0.0001 |          |                 | <0.0001 |          |
| Living alone                         | 923                    | 23.3 | 35.1            | 7.7 |          | 44.8            | 8.3     |          | ---      | ---                          | ---             | ---     |          | ---             | --- |                        | 355      | 16.1 | 35.9            | 7.4     |          | 52.9            | 7.6     |          |
| Living with family                   | 2910                   | 73.4 | 33.1            | 7.4 |          | 43.1            | 7.9     |          | ---      | ---                          | ---             | ---     |          | ---             | --- |                        | 1856‡    | 83.9 | 34.0            | 7.5     |          | 50.0            | 8.0     |          |
| Living with others                   | 130                    | 3.3  | 34.7            | 6.8 |          | 44.7            | 7.8     |          | ---      | ---                          | ---             | ---     |          | ---             | --- |                        | ---      | ---  | ---             | ---     |          | ---             | ---     |          |
| Weight status§                       |                        |      |                 |     | 0.42     |                 | 0.14    |          |          |                              |                 | 0.48    |          | 0.91            |     |                        |          |      |                 | 0.25    |          |                 | 0.15    |          |
| Underweight                          | 685                    | 17.3 | 33.3            | 7.3 |          | 43.1            | 8.1     |          | 320      | 8.4                          | 33.9            | 7.5     |          | 44.0            | 8.3 |                        | 167      | 7.6  | 33.4            | 7.1     |          | 50.2            | 8.7     |          |
| Nomal weight                         | 3015                   | 76.1 | 33.7            | 7.5 |          | 43.6            | 8.0     |          | 2904     | 76.4                         | 34.2            | 7.5     |          | 44.1            | 8.3 |                        | 1555     | 70.3 | 34.3            | 7.6     |          | 50.7            | 8.0     |          |
| Overweight                           | 263                    | 6.6  | 33.9            | 7.5 |          | 44.3            | 8.0     |          | 576      | 15.2                         | 33.8            | 7.4     |          | 44.2            | 8.2 |                        | 489      | 22.1 | 34.5            | 7.4     |          | 49.9            | 7.7     |          |
| Current smoking                      |                        |      |                 |     | 0.02     |                 | 0.06    |          |          |                              |                 | <0.0001 |          | <0.0001         |     |                        |          |      |                 | 0.001   |          |                 | <0.0001 |          |
| Yes                                  | 7                      | 0.18 | 30.8            | 6.5 |          | 38.0            | 5.4     |          | 290      | 7.6                          | 30.2            | 8.1     |          | 39.7            | 8.7 |                        | 59       | 2.7  | 31.1            | 8.1     |          | 45.2            | 8.7     |          |
| No                                   | 3956                   | 99.8 | 37.2            | 7.5 |          | 43.6            | 8.0     |          | 3510     | 92.4                         | 34.5            | 7.3     |          | 44.5            | 8.1 |                        | 2152     | 97.3 | 34.4            | 7.5     |          | 50.6            | 8.0     |          |

Supplemental Table 2. Continued

|                          | Young (n 3963) |      |                 |     |         |                 |    |   | Middle-aged (n 3800) |      |                 |     |         |                 |    |   | Older (n 2211) |      |                 |     |         |                 |    |   |         |  |  |  |         |  |  |  |
|--------------------------|----------------|------|-----------------|-----|---------|-----------------|----|---|----------------------|------|-----------------|-----|---------|-----------------|----|---|----------------|------|-----------------|-----|---------|-----------------|----|---|---------|--|--|--|---------|--|--|--|
|                          | n %            |      | Original score* |     |         | Modified score† |    |   | n %                  |      | Original score* |     |         | Modified score† |    |   | n %            |      | Original score* |     |         | Modified score† |    |   |         |  |  |  |         |  |  |  |
|                          |                |      | Mean            | SD  | P       | Mean            | SD | P |                      |      | Mean            | SD  | P       | Mean            | SD | P |                |      | Mean            | SD  | P       | Mean            | SD | P |         |  |  |  |         |  |  |  |
| Current alcohol drinking |                |      |                 |     | <0.0001 |                 |    |   |                      |      |                 |     | <0.0001 |                 |    |   |                |      |                 |     | <0.0001 |                 |    |   |         |  |  |  |         |  |  |  |
| Yes                      | 237            | 6.0  | 31.8            | 7.2 | 41.5    | 7.5             |    |   | 1872                 | 49.3 | 33.1            | 7.6 | 42.9    | 8.3             |    |   | 440            | 19.9 | 33.0            | 7.8 | 48.8    | 8.6             |    |   |         |  |  |  |         |  |  |  |
| No                       | 3726           | 94.0 | 33.7            | 7.5 | 43.7    | 8.0             |    |   | 1928                 | 50.7 | 35.1            | 7.2 | 45.3    | 8.0             |    |   | 1712           | 80.1 | 34.6            | 7.4 | 50.9    | 7.8             |    |   |         |  |  |  |         |  |  |  |
| Dietary supplement use   |                |      |                 |     | 0.92    |                 |    |   |                      |      |                 |     | 0.07    |                 |    |   |                |      |                 |     | 0.04    |                 |    |   | <0.0001 |  |  |  |         |  |  |  |
| Yes                      | 257            | 6.5  | 33.6            | 7.2 | 44.0    | 7.6             |    |   | 982                  | 25.8 | 34.5            | 7.4 | 44.8    | 8.1             |    |   | 664            | 30.0 | 34.8            | 7.5 | 51.6    | 7.6             |    |   |         |  |  |  |         |  |  |  |
| No                       | 3706           | 93.5 | 33.6            | 7.5 | 43.5    | 8.1             |    |   | 2818                 | 74.2 | 34.0            | 7.5 | 43.8    | 8.3             |    |   | 1547           | 70.0 | 34.1            | 7.5 | 50.0    | 8.2             |    |   |         |  |  |  |         |  |  |  |
| Medication use           |                |      |                 |     | 0.10    |                 |    |   |                      |      |                 |     | 0.02    |                 |    |   |                |      |                 |     | 0.64    |                 |    |   | 0.003   |  |  |  | 0.0002  |  |  |  |
| Yes                      | 427            | 10.8 | 34.2            | 7.4 | 44.7    | 8.0             |    |   | 962                  | 25.3 | 33.7            | 7.6 | 44.0    | 8.3             |    |   | 1700           | 76.9 | 34.7            | 7.4 | 50.8    | 7.9             |    |   |         |  |  |  |         |  |  |  |
| No                       | 3536           | 89.2 | 33.5            | 7.5 | 43.4    | 8.0             |    |   | 2838                 | 74.7 | 34.3            | 7.4 | 44.1    | 8.2             |    |   | 511            | 23.1 | 33.4            | 7.7 | 49.3    | 8.4             |    |   |         |  |  |  |         |  |  |  |
| Eating out               |                |      |                 |     | <0.0001 |                 |    |   |                      |      |                 |     | <0.0001 |                 |    |   |                |      |                 |     | <0.0001 |                 |    |   |         |  |  |  |         |  |  |  |
| ≤3 times/month           | 1685           | 42.5 | 32.3            | 7.9 | 44.4    | 8.1             |    |   | 2368                 | 62.3 | 32.3            | 7.6 | 44.9    | 8.3             |    |   | ---            | ---  | ---             | --- | ---     | ---             |    |   |         |  |  |  |         |  |  |  |
| Once per week            | 826            | 20.8 | 34.5            | 7.5 | 43.6    | 7.7             |    |   | 656                  | 17.3 | 34.7            | 7.5 | 43.1    | 7.8             |    |   | ---            | ---  | ---             | --- | ---     | ---             |    |   |         |  |  |  |         |  |  |  |
| 2-3 times/week           | 790            | 19.9 | 33.6            | 7.2 | 42.7    | 7.8             |    |   | 445                  | 11.7 | 33.6            | 7.1 | 42.9    | 8.2             |    |   | ---            | ---  | ---             | --- | ---     | ---             |    |   |         |  |  |  |         |  |  |  |
| ≥4 times/week            | 662            | 16.7 | 32.8            | 7.1 | 42.3    | 8.3             |    |   | 331                  | 8.7  | 33.1            | 7.5 | 41.9    | 8.2             |    |   | ---            | ---  | ---             | --- | ---     | ---             |    |   |         |  |  |  |         |  |  |  |
| Physical activity        |                |      |                 |     | 0.39    |                 |    |   |                      |      |                 |     | 0.09    |                 |    |   |                |      |                 |     | 0.28    |                 |    |   | 0.75    |  |  |  | 0.01    |  |  |  |
| Quartile 1 (lowest)      | 978            | 24.7 | 33.5            | 7.3 | 43.5    | 7.8             |    |   | 946                  | 24.9 | 34              | 7.5 | 43.8    | 8.1             |    |   | 547            | 24.7 | 34.4            | 7.5 | 49.6    | 8.3             |    |   |         |  |  |  |         |  |  |  |
| Quartile 2               | 1017           | 25.7 | 33.9            | 7.3 | 43.6    | 7.9             |    |   | 950                  | 25.0 | 34.5            | 7.6 | 44.3    | 8.3             |    |   | 558            | 25.2 | 34.5            | 7.5 | 50.4    | 7.9             |    |   |         |  |  |  |         |  |  |  |
| Quartile 3               | 1002           | 25.3 | 33.7            | 7.7 | 43.4    | 8.2             |    |   | 953                  | 25.1 | 34.3            | 7.4 | 44.4    | 8.3             |    |   | 553            | 25.0 | 34.3            | 7.9 | 51.2    | 8.1             |    |   |         |  |  |  |         |  |  |  |
| Quartile 4               | 966            | 24.4 | 33.3            | 7.6 | 43.7    | 8.3             |    |   | 951                  | 25.0 | 33.7            | 7.4 | 43.8    | 8.3             |    |   | 553            | 25.0 | 34.0            | 7.2 | 50.8    | 7.8             |    |   |         |  |  |  |         |  |  |  |
| Occupation               |                |      |                 |     | ---     |                 |    |   |                      |      |                 |     | 0.0001  |                 |    |   |                |      |                 |     | <0.0001 |                 |    |   | ---     |  |  |  | ---     |  |  |  |
| Housewife                | ---            | ---  | ---             | --- | ---     | ---             |    |   | 747                  | 19.7 | 35.1            | 7.5 | 45.3    | 8.4             |    |   | ---            | ---  | ---             | --- | ---     | ---             |    |   |         |  |  |  |         |  |  |  |
| Part-time job            | ---            | ---  | ---             | --- | ---     | ---             |    |   | 1687                 | 44.4 | 33.7            | 7.3 | 43.6    | 8.1             |    |   | ---            | ---  | ---             | --- | ---     | ---             |    |   |         |  |  |  |         |  |  |  |
| Full-time job            | ---            | ---  | ---             | --- | ---     | ---             |    |   | 1366                 | 36.0 | 34.1            | 7.6 | 44.0    | 8.3             |    |   | ---            | ---  | ---             | --- | ---     | ---             |    |   |         |  |  |  |         |  |  |  |
| Education                |                |      |                 |     | ---     |                 |    |   |                      |      |                 |     | <0.0001 |                 |    |   |                |      |                 |     | <0.0001 |                 |    |   | 0.39    |  |  |  | <0.0001 |  |  |  |
| Low                      | ---            | ---  | ---             | --- | ---     | ---             |    |   | 1823                 | 48.0 | 33.1            | 7.4 | 42.9    | 8.1             |    |   | 990            | 44.8 | 34.2            | 7.5 | 49.6    | 8.0             |    |   |         |  |  |  |         |  |  |  |
| Middle¶                  | ---            | ---  | ---             | --- | ---     | ---             |    |   | 1425                 | 37.5 | 34.6            | 7.4 | 44.7    | 8.2             |    |   | 1005           | 45.5 | 34.5            | 7.4 | 51.0    | 8.0             |    |   |         |  |  |  |         |  |  |  |
| High**                   | ---            | ---  | ---             | --- | ---     | ---             |    |   | 552                  | 14.5 | 36.2            | 7.2 | 46.6    | 7.9             |    |   | 216            | 9.8  | 33.8            | 8.1 | 52.4    | 7.8             |    |   |         |  |  |  |         |  |  |  |

**Supplemental Table 2.** Continued

|                            | Young ( <i>n</i> 3963) |      |      |                 |          |      |                 |          |          | Middle-aged ( <i>n</i> 3800) |      |         |                 |      |         |                 |          |      | Older ( <i>n</i> 2211) |         |          |         |         |          |  |  |  |
|----------------------------|------------------------|------|------|-----------------|----------|------|-----------------|----------|----------|------------------------------|------|---------|-----------------|------|---------|-----------------|----------|------|------------------------|---------|----------|---------|---------|----------|--|--|--|
|                            | Original score*        |      |      | Modified score† |          |      | Original score* |          |          | Modified score†              |      |         | Original score* |      |         | Modified score† |          |      |                        |         |          |         |         |          |  |  |  |
|                            | <i>n</i>               | %    | Mean | SD              | <i>P</i> | Mean | SD              | <i>P</i> | <i>n</i> | %                            | Mean | SD      | <i>P</i>        | Mean | SD      | <i>P</i>        | <i>n</i> | %    | Mean                   | SD      | <i>P</i> | Mean    | SD      | <i>P</i> |  |  |  |
| Current marital status     |                        |      |      |                 |          |      |                 |          |          |                              |      |         |                 |      |         |                 |          |      |                        |         |          |         |         |          |  |  |  |
| Yes                        | ---                    | ---  | ---  | ---             | ---      | ---  | ---             | 3479     | 91.6     | 34.2                         | 7.4  | 0.001   | 44.2            | 8.2  | 0.002   | 1346            | 60.9     | 33.9 | 7.4                    | 0.003   | 50.3     | 7.9     | 0.19    |          |  |  |  |
| No                         | ---                    | ---  | ---  | ---             | ---      | ---  | ---             | 321      | 8.5      | 32.9                         | 8.2  |         | 42.7            | 8.6  |         | 865             | 39.1     | 34.9 | 7.7                    |         | 50.8     | 8.2     |         |          |  |  |  |
| Dietary reporting status†† |                        |      |      | <0.0001         |          |      | <0.0001         |          |          |                              |      |         | <0.0001         |      |         |                 |          |      | <0.0001                |         |          | <0.0001 |         |          |  |  |  |
| Under-reporting            | 742                    | 18.7 | 34.5 | 7.2             |          | 44.2 | 7.6             | 291      | 7.7      | 32.9                         | 8.4  | <0.0001 | 43.0            | 8.8  | <0.0001 | 141             | 6.4      | 32.8 | 7.8                    | <0.0001 | 47.4     | 9.6     | <0.0001 |          |  |  |  |
| Plausible reporting        | 2962                   | 74.7 | 33.8 | 7.4             |          | 43.6 | 8.1             | 3085     | 81.2     | 34.6                         | 7.4  |         | 44.4            | 8.2  |         | 1549            | 70.1     | 35.2 | 7.7                    |         | 51.0     | 8.1     |         |          |  |  |  |
| Over-reporting             | 259                    | 6.5  | 29.0 | 7.2             |          | 40.7 | 8.2             | 424      | 11.2     | 31.5                         | 7.1  |         | 42.5            | 8.3  |         | 521             | 23.6     | 32.1 | 6.4                    |         | 49.8     | 7.1     |         |          |  |  |  |

† Possible score ranging from 0 to 70; see Supplemental Table 1 for more detail.

‡ Including women living with others because of the small numbers of subjects (*n* 4).

§ Underweight were defined as subjects with BMI <18.5 kg/m<sup>2</sup>; normal weight defined as subjects with BMI ≥18.5 to <25 kg/m<sup>2</sup>; overweight defined as subjects with BMI ≥25.0 kg/m<sup>2</sup>.

|| ≤12 years for middle-aged women and ≤9 years for older women.

¶ 13-15 years for middle-aged women and 10-12 years for older women.

\*\* ≥16 years for middle-aged women and ≥13 years for older women.

†† Under-reporting were defined as subjects with a ratio of reported energy intake to BMR (EI:BMR) <1.09; plausible reporting defined as subjects with EI:BMR 1.09-2.21; over-reporting defined as subjects with EI:BMR > 2.21.
